# Supplementary material for: Discovery of novel cardiac troponin activators using fluorescence polarization-based high throughput screening assays
Source: PubMed Central journal article supplement (PMC10063609; doi:10.1038/s41598-023-32476-w), 2023-03-30
Supplement: 41598_2023_32476_MOESM1_ESM.pdf [file 41598_2023_32476_MOESM1_ESM.pdf]

# Supplementary Information

## **Discovery of Novel Cardiac Troponin Activators using Fluorescence Polarization-based High Throughput Screening Assays**

Priyanka Parijat<sup>1</sup>, Saraswathi Ponnamp<sup>1</sup>, Seetharamaiah Attili<sup>1</sup>, Kenneth S. Campbell<sup>2</sup>,  
Mohammed El-Mezgueldi<sup>1</sup>, Mark Pfuhl<sup>1</sup> and Thomas Kampourakis<sup>1,\*</sup>

<sup>1</sup>Randall Centre for Cell and Molecular Biophysics; and British Heart Foundation Centre of Research Excellence, King's College London, London, SE1 1UL, United Kingdom

<sup>2</sup>Department of Physiology, and Division of Cardiovascular Medicine, University of Kentucky, Lexington, Kentucky

## Supplementary Information Figures and Figure Legends

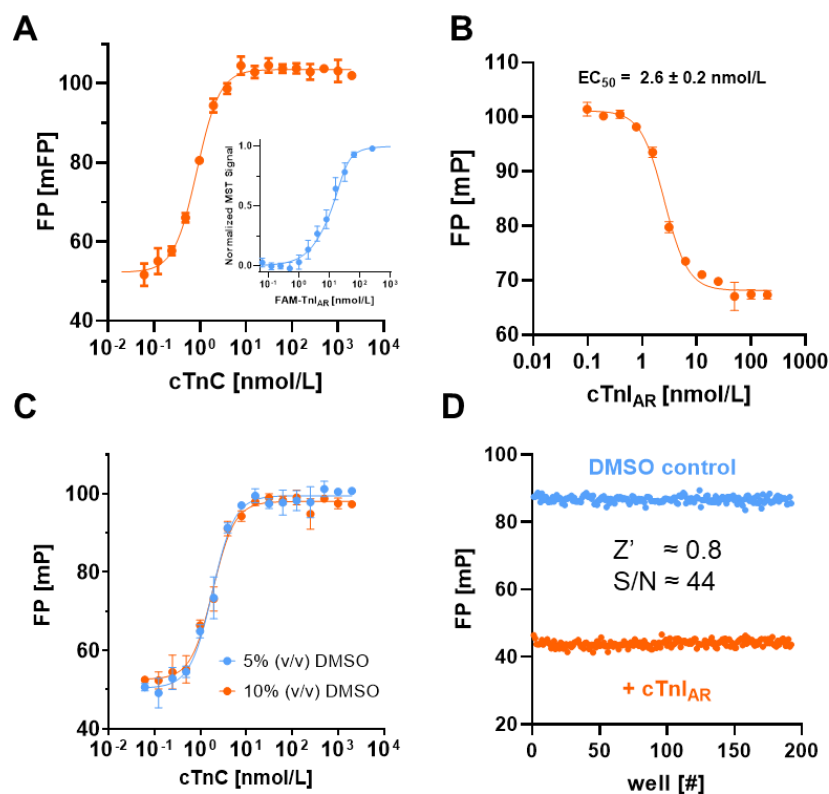

**Figure S1. Characterization and Validation of the cTnI<sub>AR</sub> HTS assay** (A) Interaction of FAM-cTnI<sub>AR</sub> with cTnC monitored by fluorescence polarization (FP). FAM-cTnI<sub>AR</sub> was titrated against increasing concentrations of cTnC (orange). Inset: Interaction of Alexa647-labelled cTnC and FAM-cTnI<sub>AR</sub> measured by Microscale Thermophoresis (blue). (B) Competitive titration of a mixture of 2 nmol/L FAM-cTnI<sub>AR</sub> and 5 nmol/L cTnC against increasing concentrations of unlabelled cTnI<sub>AR</sub> peptide monitored by FP. (C) Interaction of FAM-cTnI<sub>AR</sub> with cTnC monitored by fluorescence polarization (FP) in the presence of 5% (v/v) (blue) and 10% (v/v) orange dimethyl sulfoxide (DMSO). (D) FP measured from a mixture of FAM- cTnI<sub>AR</sub> and cTnC in the presence of either vehicle control (DMSO, blue) or 50 nmol/L unlabelled cTnI<sub>AR</sub> peptide (orange) in 384-well format. Means SEM, n=3-5.

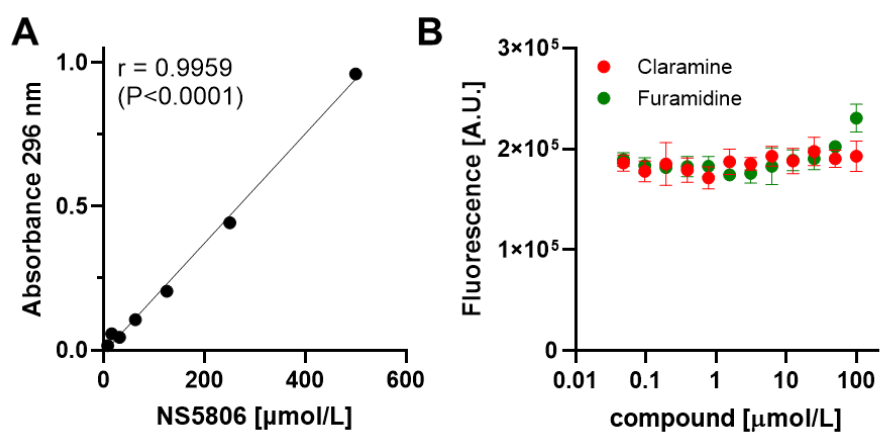

**Figure S2.** (A) Water solubility of NS5806. DMSO stocks of NS5806 were diluted with assay buffer to the indicated concentrations (fixed DMSO concentration of 0.1% (v/v)), potential aggregates removed by ultra-centrifugation and the absorbance at 296 nm plotted against the compound concentrations. The linear increase in absorbance suggests that NS5806 is soluble in aqueous buffers up to a concentration of at least 500  $\mu\text{mol/L}$ . (B) Total fluorescent intensity dose-response curves for Claramine (red) and Furamidine (green) in the presence of 2 nmol/L FAM-cTnI<sub>AR</sub> and 5 nmol/L cTnC.

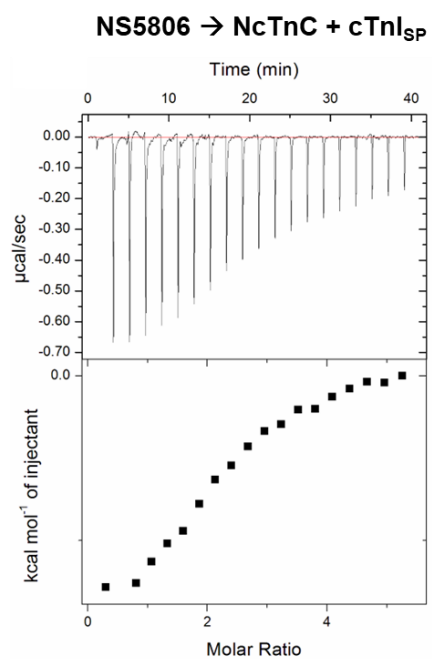

**Figure S3.** Thermogram of NS5806 titration into a mixture of the  $\text{Ca}^{2+}$ -saturated N-lobe of cTnC (NcTnC) and the cTnI switch peptide (SP).

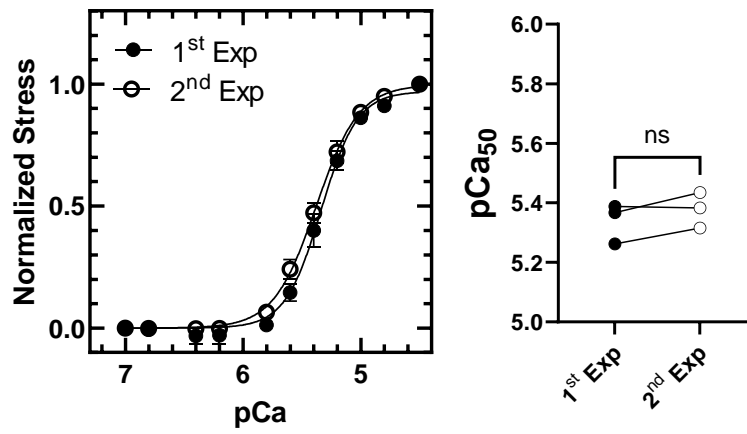

**Figure S4.** Force-pCa relation of demembrated human donor heart muscle strips for two consecutive experiments on the same preparation. Means  $\pm$  SEM, n=3. Statistical significance of differences was assessed with a two-tailed student's t-test: ns-not significant.

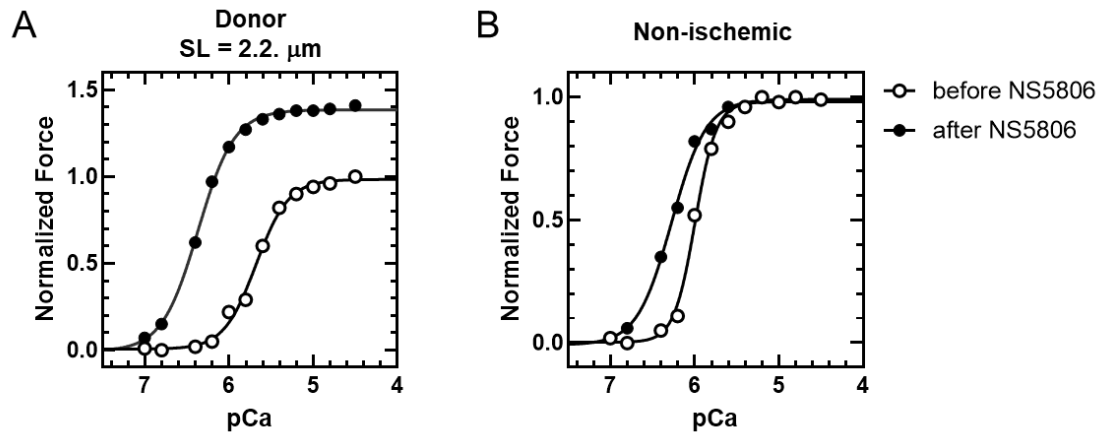

**Figure S5.** (A) Force-pCa relation of demembrated human donor heart muscle strips before (open circles) and after NS5806 incubation (closed circles) at long sarcomere length (2.2  $\mu\text{m}$ ). (B) Force-pCa relation of demembrated human heart muscle strips from ischemic heart failure patients before and after NS5806 incubation.

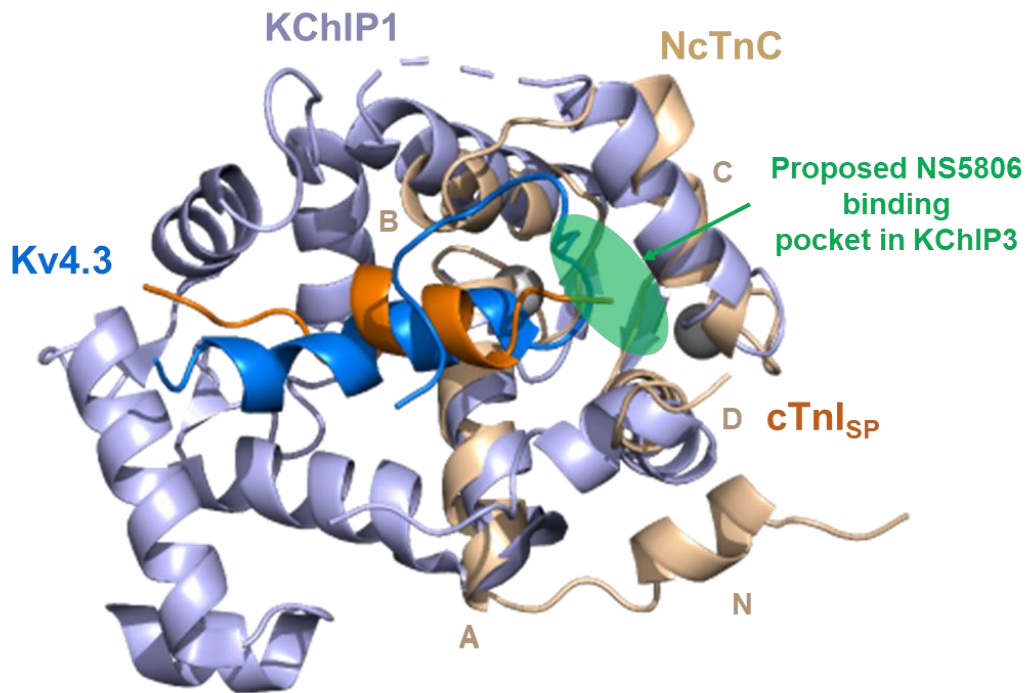

**Figure S6.** Structural alignment of the N-lobe of cTnC (NcTnC, yellow) bound to cTnI switch peptide (cTnI<sub>SP</sub>, orange) (PDB entry 1MXL) with KChIP3 (purple) bound to a fragment of Kv4.3 (blue) (PDB entry 2I2R). NcTnC helices and proposed NS5806 binding site in KChIP are labelled accordingly.

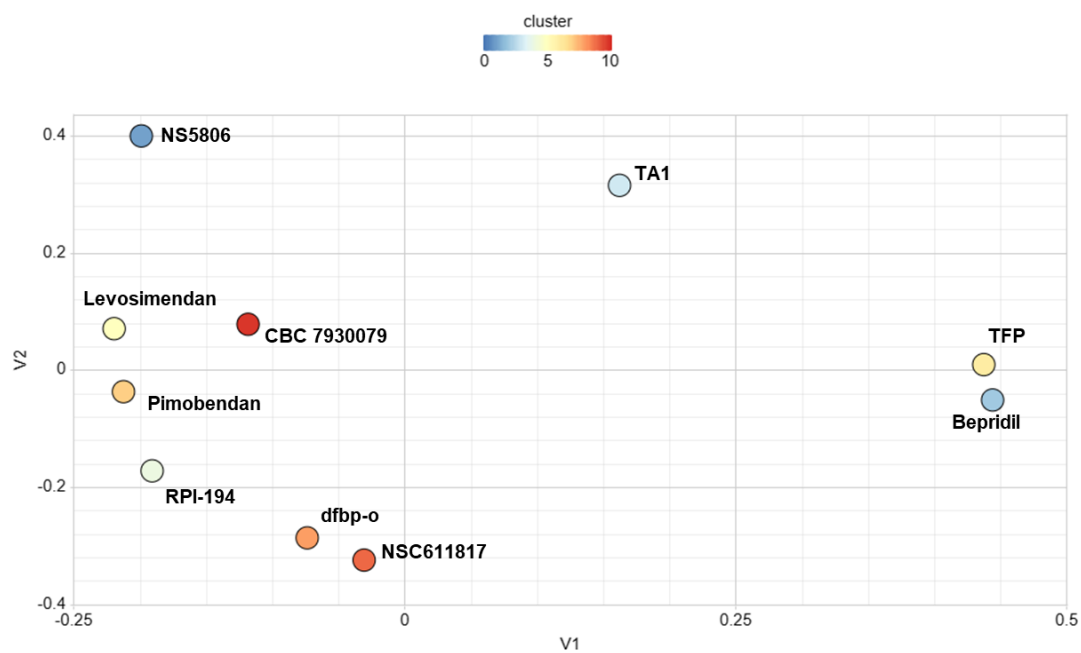

**Figure S7.** Structural clustering of known cardiac troponin C calcium sensitizers using multi-dimensional scaling (TFP – Trifluoperazine, CBC 7930079 – ChemBridge Compound 7930079).



## Supplementary Information Tables and Table Legends

**Table S1.** Hit compounds identified in cTnI<sub>SP</sub> primary screens.

| <b>Library</b>          | <b>Compound</b>                   | <b>FP (mP)</b> |
|-------------------------|-----------------------------------|----------------|
| <b>ENZO Screenwell®</b> | Sertaconazole                     | 88.2           |
|                         | Clomiphene Citrate                | 63.2           |
|                         | Gefitinib                         | 83.7           |
|                         | Chlorpromazine.HCl                | 88.9           |
|                         | Fluphenazine.HCl                  | 76.1           |
|                         | Raloxifene.HCl                    | 76.9           |
|                         | Cinacalcet.HCl                    | 82.4           |
|                         | Fingolimod                        | 66.1           |
|                         | Clofazimine                       | 85.2           |
|                         | Toremifene Base                   | 60.7           |
|                         | Colistin Sulfate                  | 78.5           |
|                         | Thioridazine.HCl                  | 74.3           |
|                         | Tamoxifen Citrate                 | 69.1           |
|                         | Reserpine                         | 88.4           |
|                         | Sulconazole Nitrate               | 87.6           |
|                         | Perphenazine                      | 73.2           |
|                         | Levothyroxine·Na                  | 119.8          |
|                         | Micafungin                        | 128.6          |
| <b>TOCRIScreen</b>      | Tamoxifen citrate                 | 62.2           |
|                         | Raloxifene hydrochloride          | 87.9           |
|                         | Raloxifene hydrochloride          | 82.1           |
|                         | (S)-(+)-Niguldipine hydrochloride | 85.7           |
|                         | SR 33805 oxalate                  | 79             |
|                         | Tetrindole mesylate               | 65             |
|                         | JTC 801                           | 84.3           |
|                         | Bax channel blocker               | 77.1           |
|                         | NSC 23766                         | 89.5           |
|                         | PD 166285 dihydrochloride         | 78.7           |
|                         | Dynole 34-2                       | 64.1           |
|                         | Y 134                             | 78.9           |
|                         | C 021 dihydrochloride             | 87.1           |
|                         | NPS 2143 hydrochloride            | 87.5           |
|                         | Bepidil hydrochloride             | 87             |
|                         | GF 109203X                        | 82.4           |
|                         | PF 477736                         | 64             |
|                         | CCT 137690                        | 83.6           |
|                         | Ro 31-8220 mesylate               | 57.9           |
|                         | Ro 3280                           | 81.8           |
|                         | IKK 16                            | 82             |
|                         | 10-DEBC hydrochloride             | 82.8           |
|                         | PHA 665752                        | 76.4           |
|                         | CASIN                             | 80.4           |
|                         | PQ 401                            | 80.2           |
|                         | DDR1-IN-1 dihydrochloride         | 74.4           |
|                         | BMS 599626 dihydrochloride        | 88.2           |

|                            |                                      |      |
|----------------------------|--------------------------------------|------|
| Mps1-IN-1 dihydrochloride  | 84.6                                 |      |
| GSK 1562590 hydrochloride  | 89.9                                 |      |
| TC-S 7003                  | 73.5                                 |      |
| FRAX 486                   | 83.2                                 |      |
| HKI 357                    | 73.4                                 |      |
| AZ 191                     | 83.4                                 |      |
| Sunitinib malate           | 83.4                                 |      |
| NVP ADW 742                | 68.4                                 |      |
| AMG 548                    | 90                                   |      |
| XMD 8-87                   | 81.2                                 |      |
| AEE 788                    | 77.8                                 |      |
| CHR 6494 trifluoroacetate  | 81.9                                 |      |
| ERK5-IN-1                  | 64.9                                 |      |
| TAK 960 hydrochloride      | 88                                   |      |
| SU 11274                   | 64.5                                 |      |
| BS 181 dihydrochloride     | 73.2                                 |      |
| HTH 01-015                 | 87.1                                 |      |
| ZM 447439                  | 89.2                                 |      |
| Iressa                     | 81.8                                 |      |
| UNC 1999                   | 80.5                                 |      |
| Furamide dihydrochloride   | 83.1                                 |      |
| AZ 6102                    | 83.4                                 |      |
| WH-4-023                   | 56.3                                 |      |
| Prochlorperazine dimaleate | 78.2                                 |      |
| FTY 720                    | 71.6                                 |      |
| Deltarasin                 | 87.7                                 |      |
| DG 172 dihydrochloride     | 81                                   |      |
| Bazedoxifene acetate       | 74.5                                 |      |
| SP 100030                  | 70.3                                 |      |
| Aripiprazole               | 86                                   |      |
| Calpeptin                  | 121.8                                |      |
| CFTRinh 172                | 127.9                                |      |
| NS 3623                    | 121.6                                |      |
| NS 5806                    | 137.6                                |      |
| <hr/>                      |                                      |      |
| <b>LOPAC®1280</b>          | Chlorpromazine hydrochloride         | 91.3 |
|                            | IKK-16 dihydrochloride               | 84.3 |
|                            | Calmidazolium chloride               | 83.6 |
|                            | Benazoline oxalate                   | 83.7 |
|                            | TNP                                  | 90.9 |
|                            | Arbidol hydrochloride                | 89.4 |
|                            | WZ4003                               | 86.4 |
|                            | Enclomiphene hydrochloride           | 78.4 |
|                            | CYM50358                             | 84.1 |
|                            | Fluspirilene                         | 88.6 |
|                            | cis-(Z)-Flupenthixol dihydrochloride | 87.6 |
|                            | Ellipticine                          | 86.1 |
|                            | Fluphenazine dihydrochloride         | 87.3 |
|                            | CID2858522                           | 89.6 |
|                            | Methiothepin mesylate                | 86.5 |
|                            | NNC 55-0396                          | 88.7 |
|                            | AZ191                                | 88.5 |

|                                    |       |
|------------------------------------|-------|
| BMS-189453                         | 88.8  |
| Raloxifene hydrochloride           | 85.5  |
| Pyridostatin trifluoroacetate salt | 85.6  |
| Tegaserod maleate                  | 78.4  |
| SID 3712249                        | 86.6  |
| Ruthenium red                      | 83.7  |
| Trifluoperazine dihydrochloride    | 84.5  |
| Lasofloxifene tartrate             | 86.8  |
| CCT137690                          | 87    |
| Thioridazine hydrochloride         | 89.4  |
| HTH-01-015                         | 87    |
| Furamidine dihydrochloride         | 91.8  |
| Prochlorperazine dimaleate         | 86.2  |
| Palmitoyl-DL-Carnitine chloride    | 109.8 |
| 5HPP-33                            | 112   |

---

**Table S2.** Hit compounds identified in cTnI<sub>AR</sub> primary screens.

| <b>Library</b>          | <b>Compound</b>                                    | <b>FP (mP)</b> |
|-------------------------|----------------------------------------------------|----------------|
| <b>ENZO Screenwell®</b> | Carboplatin                                        | 67.3           |
|                         | Oxcarbazepine                                      | 70.9           |
|                         | Cisplatin (Cis-Diamineplatinum(Ii)<br>Dichloride ) | 61.9           |
|                         | Colistin Sulfate                                   | 71.7           |
|                         | Chlorhexidine Dihydrochloride                      | 58.8           |
|                         | Indapamide                                         | 116.5          |
|                         | Fomepizole                                         | 118            |
| <b>TOCRIScreen</b>      | WIN 64338 hydrochloride                            | 71             |
|                         | Furamide dihydrochloride                           | 73.2           |
|                         | GSK 269962                                         | 104.8          |
|                         | A 425619                                           | 105.5          |
|                         | DQP 1105                                           | 103            |
|                         | GF 109203X                                         | 104.5          |
|                         | TC-S 7010                                          | 108.3          |
|                         | AZD 3988                                           | 115.5          |
|                         | Repaglinide                                        | 103.2          |
| <b>LOPAC®1280</b>       | Icaritin                                           | 64.6           |
|                         | KT203                                              | 71.7           |
|                         | Claramine                                          | 53.9           |
|                         | SP600125                                           | 65             |
|                         | Cisplatin                                          | 56.6           |
|                         | Mitoxantrone                                       | 57.1           |
|                         | Ruthenium red                                      | 44.3           |
|                         | cDPCP                                              | 67.5           |
|                         | GW2974                                             | 117.8          |
|                         | Leukadherin-1                                      | 121.9          |
|                         | U-74389G maleate                                   | 115.3          |
|                         | Tyrphostin AG 112                                  | 115.8          |

**Table S3.** Summary of steady-state dissociation constants ( $K_d$  in  $\mu\text{mol/L}$ ) of hit compounds binding to cardiac troponin constructs measured by isothermal titration calorimetry.

|                   | $\text{Ca}^{2+}/\text{NcTnC}$ | $\text{Ca}^{2+}/\text{cChimera}$ | cChimera | $\text{Ca}^{2+}/\text{NcTnC}/\text{cTnI}_{\text{SP}}$ | $\text{Ca}^{2+}/\text{cTnC}$ |
|-------------------|-------------------------------|----------------------------------|----------|-------------------------------------------------------|------------------------------|
| <b>NS5806</b>     | 60.7                          | $7.6 \pm 0.3$                    | cnd      | 18.7                                                  |                              |
| <b>Furamidine</b> |                               |                                  |          |                                                       | $11.9 \pm 5.5$               |
| <b>Claramine</b>  |                               |                                  |          |                                                       | $21.6 \pm 1.8$               |

Means  $\pm$  SEM, n=1-5. cnd-cannot be reliably determined.
